# Supplementary material for: Warmer summer nocturnal surface air temperatures and cardiovascular disease death risk: a population-based study
Source: HighWire-hosted journal article supplement (doi:10.1136/bmjopen-2021-056806), 2022-03-01
Supplement: bmjopen-2021-056806supp001_data_supplement.pdf [file bmjopen-2021-056806supp001_data_supplement.pdf]

## A) Men

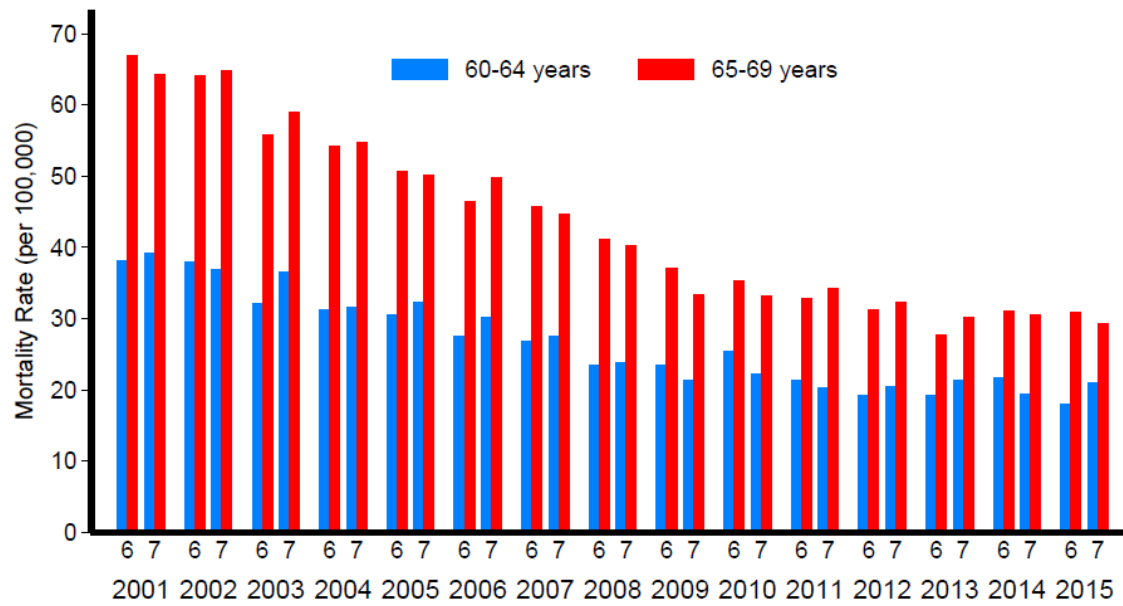

## B) Women

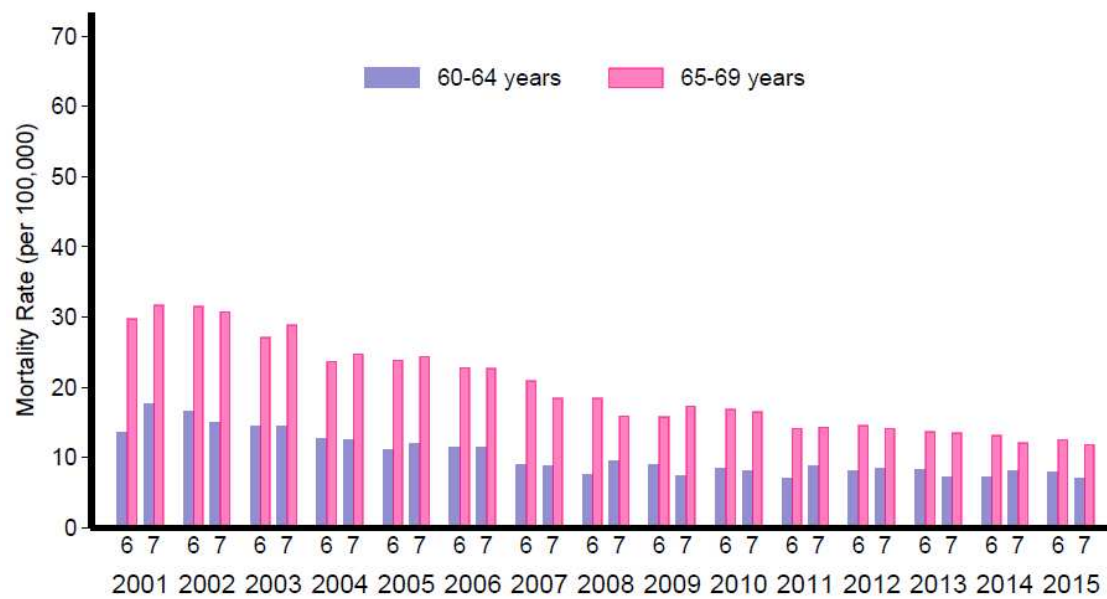

**Supplementary Figure 1:** Monthly summer (6=June, 7=July) cardiovascular mortality trends by age-groups among (A) men and (B) women from 2001-2015 in England and Wales.
